# Supplementary material for: The mammalian PYHIN gene family: Phylogeny, evolution and expression
Source: PubMed Central journal article supplement (PMC3458909; doi:10.1186/1471-2148-12-140), 2012-08-07
Supplement: 1471-2148-12-140-S2.pdf [file 1471-2148-12-140-S2.pdf]

**Supplementary Table 1.** Summary of sources of sequence data for HIN and pyrin domains, for all animals other than human, mouse and rat, which are given in Table 1 of the manuscript.

| Species         | Accession Numbers                                    | Pyrin Tree Label | HIN Tree Label   |
|-----------------|------------------------------------------------------|------------------|------------------|
| Armadillo       | GenBank: AAGV020383493.1                             | Armadillo 1      | Armadillo 1      |
|                 | GenBank: AAGV020335327.1                             | Armadillo a      | -                |
| Chimpanzee      | GenBank: XP_525227.2                                 | Chimpanzee Ifix  | Chimpanzee Ifix  |
|                 | GenBank: XP_525225.2                                 | Chimpanzee Mnda  | Chimpanzee Mnda  |
|                 | GenBank: XP_513914.2                                 | Chimpanzee Aim2  | Chimpanzee Aim2  |
|                 | GenBank: XP_513913.2                                 | Chimpanzee Ifi16 | Chimpanzee Ifi16 |
| Cow             | GenBank: XP_869021.2                                 | Cow 1            | Cow 1            |
| Dog             | GenBank: XP_003434347.1                              | Dog 1            | Dog 1            |
|                 | GenBank: XP_545739.2                                 | Dog 2            | Dog 2            |
| Dolphin         | GenBank: ABRN01216818.1                              |                  | Dolphin 1        |
|                 | GenBank: ABRN01216816.1                              | Dolphin a        |                  |
| Elephant        | GenBank: NW_003573453.1                              | Elephant 1       | Elephant 1       |
|                 | GenBank: NW_003573453.1                              |                  | Elephant 2       |
|                 | GenBank: NW_003573453.1                              |                  | Elephant 3       |
|                 | GenBank: NW_003573453.1                              | Elephant a       |                  |
|                 | GenBank: NW_003573453.1                              | Elephant b       |                  |
| Horse           | Ensembl Genscan prediction:<br>GENSCAN00000027147    |                  | Horse 1          |
|                 | Ensembl Genscan prediction:<br>GENSCAN00000027123    | Horse a          |                  |
|                 | Ensembl Genscan prediction:<br>GENSCAN00000027134    | Horse 2          | Horse 2          |
|                 | GenBank: XR_035879.2                                 | Horse 3          | Horse 3          |
|                 | GenBank: XP_001490553.2                              | Horse 4          | Horse 4          |
|                 | GenBank: XP_001490598.2                              | Horse 5          | Horse 5          |
|                 | GenBank: XP_001915358.1                              | Horse Aim2       | Horse Aim2       |
| Hyrax           | GenBank: ABRQ01399281.1                              |                  | Hyrax 1          |
|                 | GenBank: ABRQ01467223.1                              |                  | Hyrax 2          |
|                 | GenBank: ABRQ01154641.1                              | Hyrax a          |                  |
|                 | GenBank: ABRQ01441138.1                              | Hyrax b          |                  |
|                 | GenBank: ABRQ01399280.1                              | Hyrax c          |                  |
| Opossum         | GenBank: NW_001581871.1                              | Opossum 1        | Opossum 1        |
| Pig             | GenBank: XP_001929247.1                              | Pig 1            | Pig 1            |
|                 | GenBank: XP_003125734.1                              | Pig 2            | Pig 2            |
| Sloth           | GenBank: ABVD01220630.1                              |                  | Sloth 1          |
|                 | GenBank: ABVD01534538.1                              | Sloth a          |                  |
|                 | GenBank: ABVD01614599.1                              | Sloth b          |                  |
| Tasmanian devil | GenBank: GL972687                                    | Tas. devil 1     | Tas. devil 1     |
| Treeshrew       | GenBank: AAPY01470609.1                              | Treeshrew a      |                  |
| Wallaby         | GenBank: ABQQ010679940.1                             | Wallaby a        |                  |
|                 | GenBank: ABQQ010283775.1<br>GenBank: ABQQ010284350.1 |                  | Wallaby 1        |
