# Supplementary material for: The mammalian PYHIN gene family: Phylogeny, evolution and expression
Source: PubMed Central journal article supplement (PMC3458909; doi:10.1186/1471-2148-12-140), 2012-08-07
Supplement: 1471-2148-12-140-S4.pdf [file 1471-2148-12-140-S4.pdf]

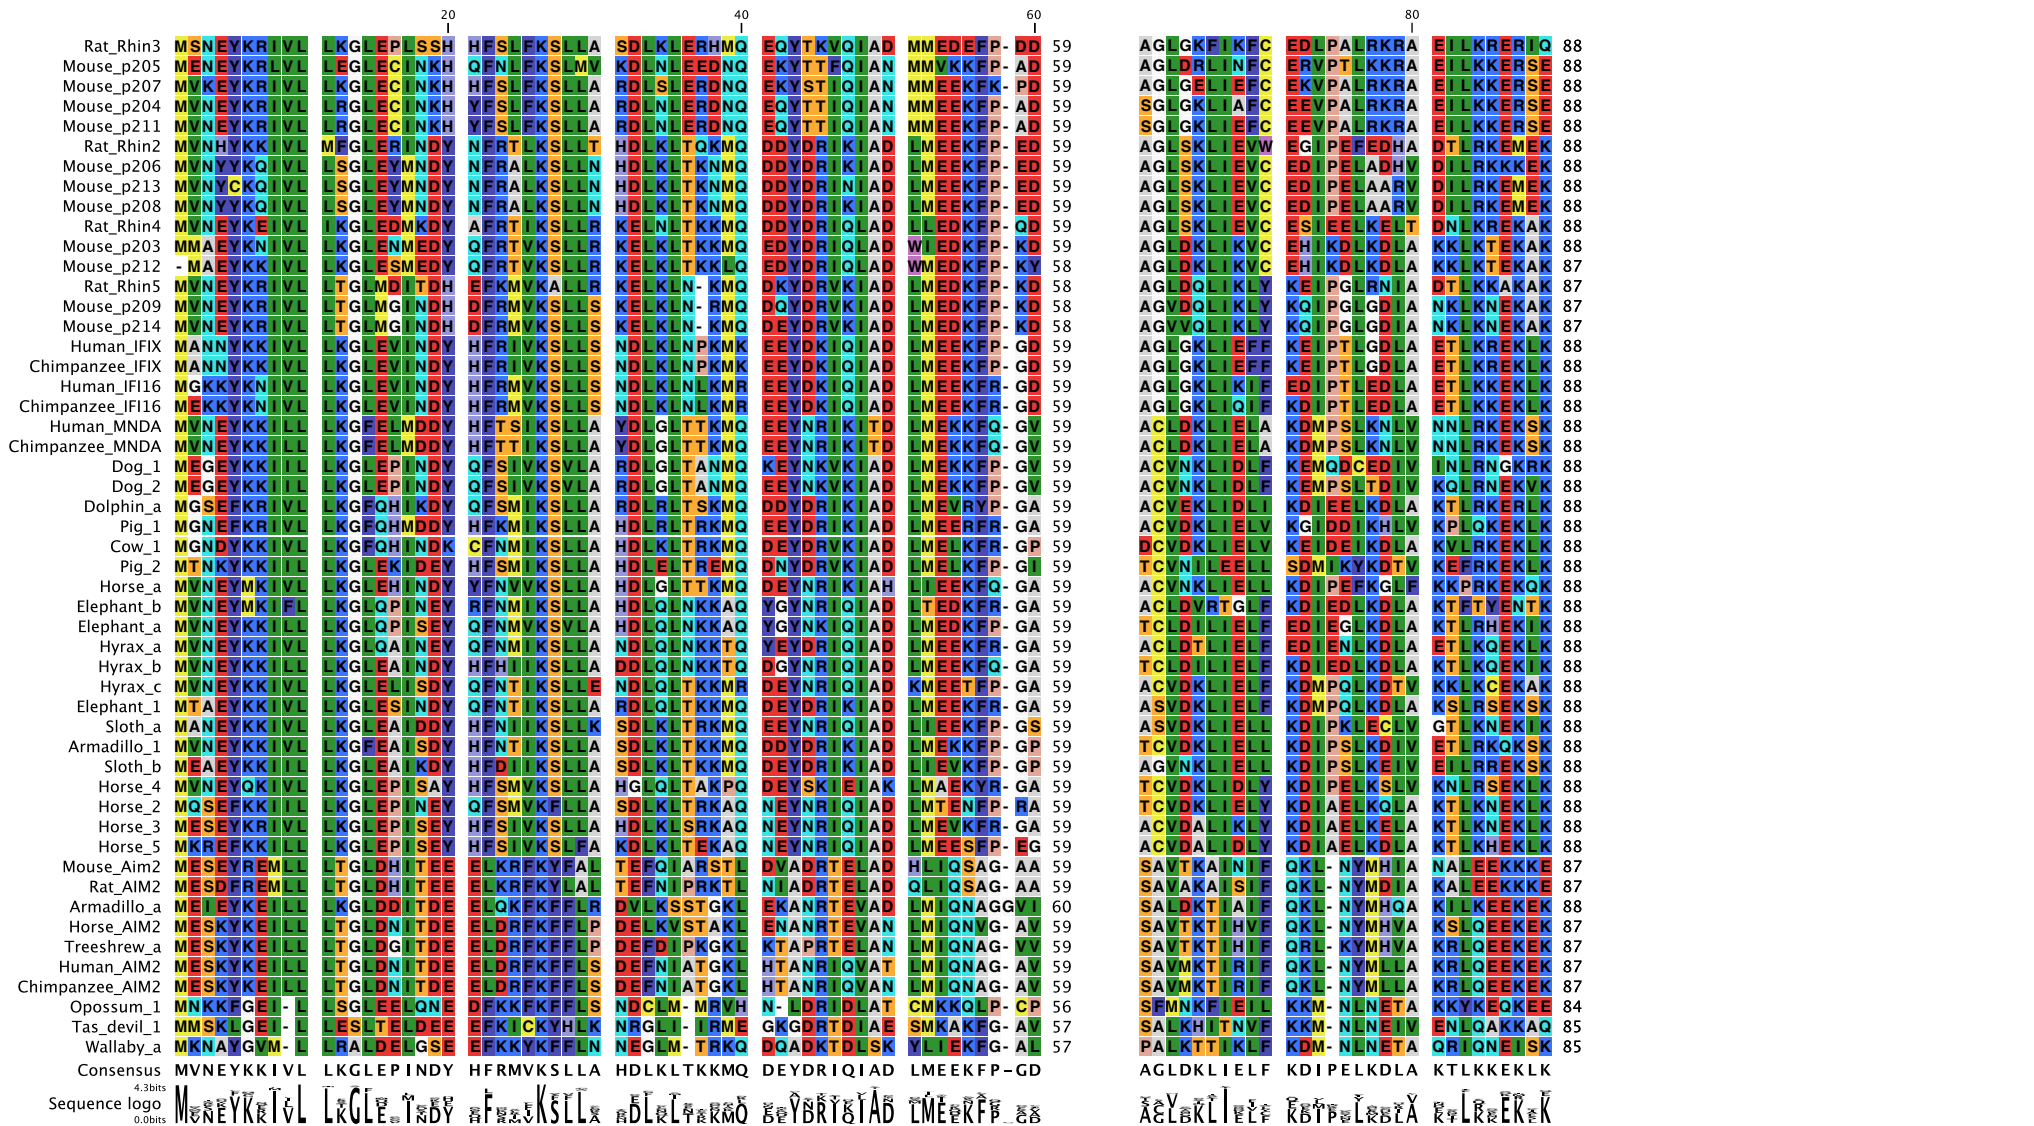

**Supplementary Figure 4.** Alignment of pyrin domains from PYHIN proteins. Alignment was performed with ClustalW2, with minor adjustment to position the gaps in accordance with evident gaps in a nucleotide sequence alignment. The pyrin domain is encoded by a single exon in all PYHIN proteins. Sequences were derived from three sources – (i) reference sequences for established genes, (ii) predicted genes in NCBI or Ensembl databases, (iii) de novo exon prediction following identification of sequences homologous to human IFI16 or AIM2 using TBLASTN searches. See Table 1 and Online Resource Table 2 for accession numbers for sequences used.
