# Supplementary material for: The mammalian PYHIN gene family: Phylogeny, evolution and expression
Source: PubMed Central journal article supplement (PMC3458909; doi:10.1186/1471-2148-12-140), 2012-08-07
Supplement: 1471-2148-12-140-S5.pdf [file 1471-2148-12-140-S5.pdf]

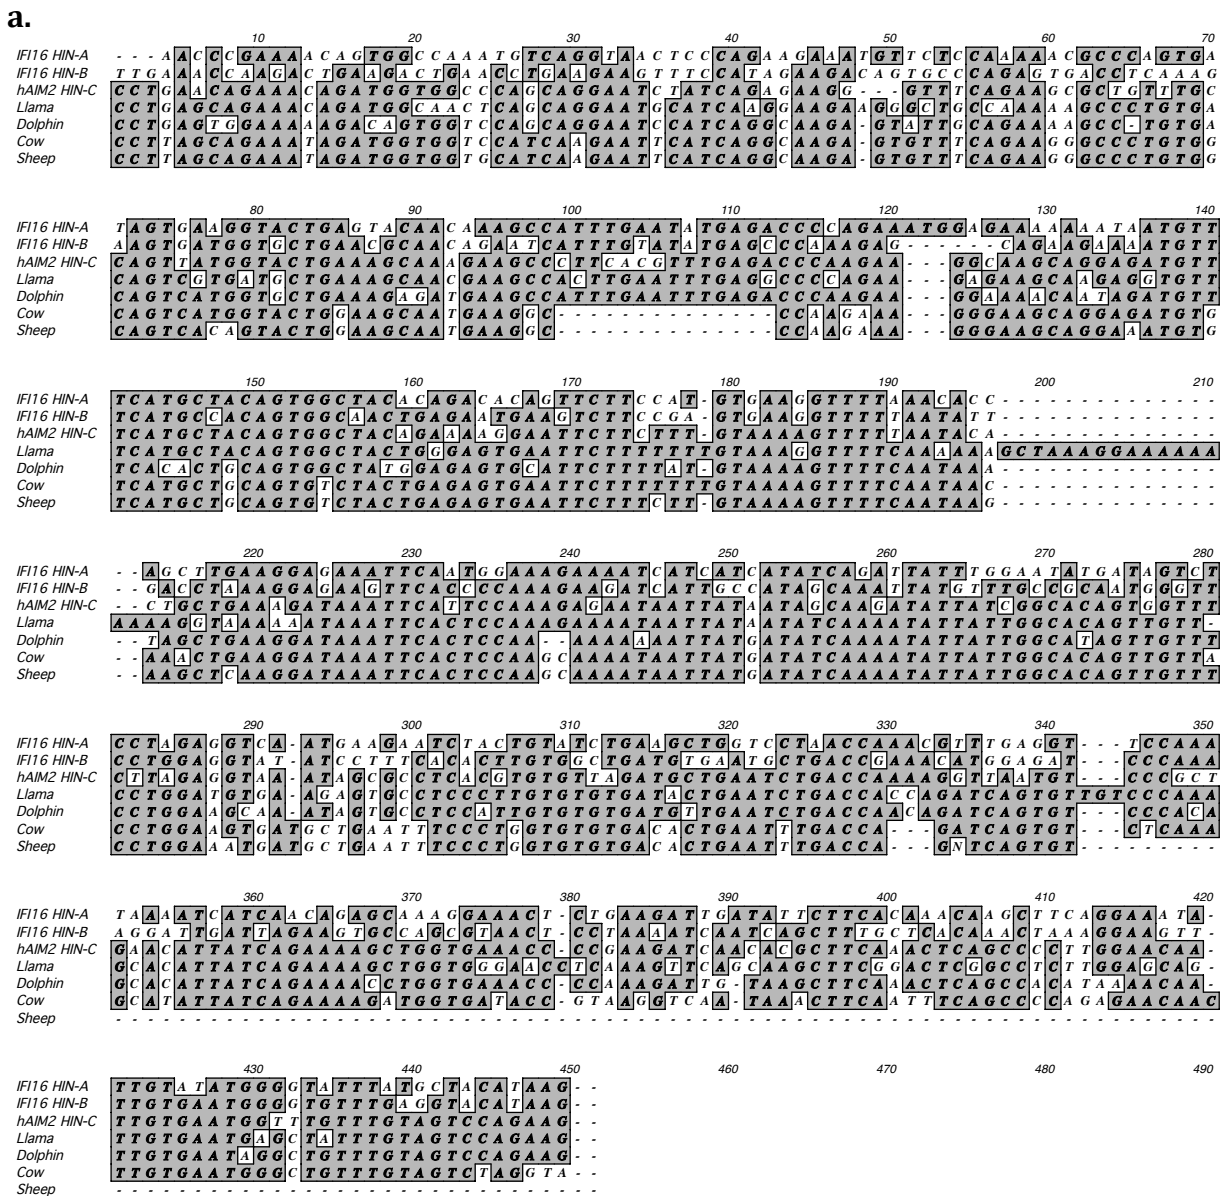

**Supplementary Figure 5.** BLAST searches of dolphin, cow, llama and sheep genome sequences with the AIM2 HIN domain revealed an *AIM2* pseudogene, and no trace of an intact *AIM2* gene. Sequences were obtained by TBLASTN searches on the dolphin, cow and llama genomes (Ensembl) using human AIM2 HIN-C domain, and a BLAST search on the sheep whole genome shot-gun sequence database (NCBI) using the cow pseudogene sequence. **a.** A clustalW alignment is shown between the first exon encoding human IFI16 HIN-A, IFI16 HIN-B, human AIM2 HIN-C, and sequences obtained from cow, dolphin, lama and sheep. Multiple frameshifts and/or stop codons are present in the cow, dolphin, lama and sheep sequences. **b.** Pairwise comparisons of these sequences shown in the table reveal that the pseudogenes obtained have higher similarity to DNA encoding the HIN-C domain of AIM2, than to HIN-A or HIN-B encoding DNA. Pig, which falls within the same evolutionary clade as the animals studied here was searched extensively for *AIM2*, and showed no gene or pseudogene with closer homology to *AIM2* than to *IFI16*. *AIM2* pseudogenes are also seen in dog and elephant (not shown).
