# Supplementary material for: The mammalian PYHIN gene family: Phylogeny, evolution and expression
Source: PubMed Central journal article supplement (PMC3458909; doi:10.1186/1471-2148-12-140), 2012-08-07
Supplement: 1471-2148-12-140-S7.pdf [file 1471-2148-12-140-S7.pdf]

**Supplementary Table 2.** Sequences of primers for realtime PCR analysis

| Mouse  | Forward                     | Reverse                     |
|--------|-----------------------------|-----------------------------|
| Ifi202 | GAGAAAAGGAAATGGGAAACC       | TCAATGCCACCACTTGTTTG        |
| Ifi203 | CTCTCACAAGCAAAGGGGACA       | TCCAATTCCATAGCAAATGCAC      |
| Ifi204 | TGGAGAACACAGTTTCATCAAGATATC | ACTTGTTTGGGACCATGATGGT      |
| Ifi205 | GACTGATCAACTTTTGTGAACGTGTA  | GCAGGACTTGCTTCTTGCCTATT     |
| Ifi206 | AATACCCAGCAGTTACCAAAAATTCC  | CCATTTTCTTCAGAAGGTTGTTTAGGT |
| Ifi207 | TTATGGCACCACCAACACCA        | TCCTGAGGACCCCTTGTCTTT       |
| Ifi208 | TCCAGCAAAGCCACTCAAGG        | CAGACTGGGGATTCTGCATTTT      |
| Ifi209 | GGAGGTCTACGGACGACTGA        | GTGCTTTTTCTTCATCTGGGAT      |
| Aim2   | GAATGGGCTGTTTAAAGTCCAGAAG   | CCTTCCTCGCACTTTGTTTTGC      |
| Ifi212 | CCAGCAGTTCCTCAAACAAGAA      | GTTCCCTAAAGGTTCTGGAAGCTGA   |
| Ifi213 | AATCAGAATCCAGCCCTCT         | GTGAGATCTTAGACGGTGTACCTC    |
| Ifi214 | TGGAGTTCTTCTAGCAACACCA      | TTTTGGAACCTTGCTGGTAAC       |
| Tbp    | GACCTAAAGACCATTCGACTTCGT    | GCAGTTGTCCGTGGCTCTCT        |
| Hprt   | CAGTCCCAGCGTCGTGATTAG       | AAACACTTTTTCCAAATCCTCGG     |
| Cxxc1  | CAGACGTCTTTTGGGTCCA         | AGACCTCATCAGCTGGCAC         |
| Rpl13A | GAGGTCGGGTGGAAGTACCA        | TGCATCTTGGCCTTTTCCTT        |
